# Supplementary material for: C1q/TNF‐Related Protein 9 Protects Diabetic Rat Heart against Ischemia Reperfusion Injury: Role of Endoplasmic Reticulum Stress
Source: Hindawi journal article supplement (doi:10.1155/2016/1902025), 2016-01-01

## Supplementary Figure 1

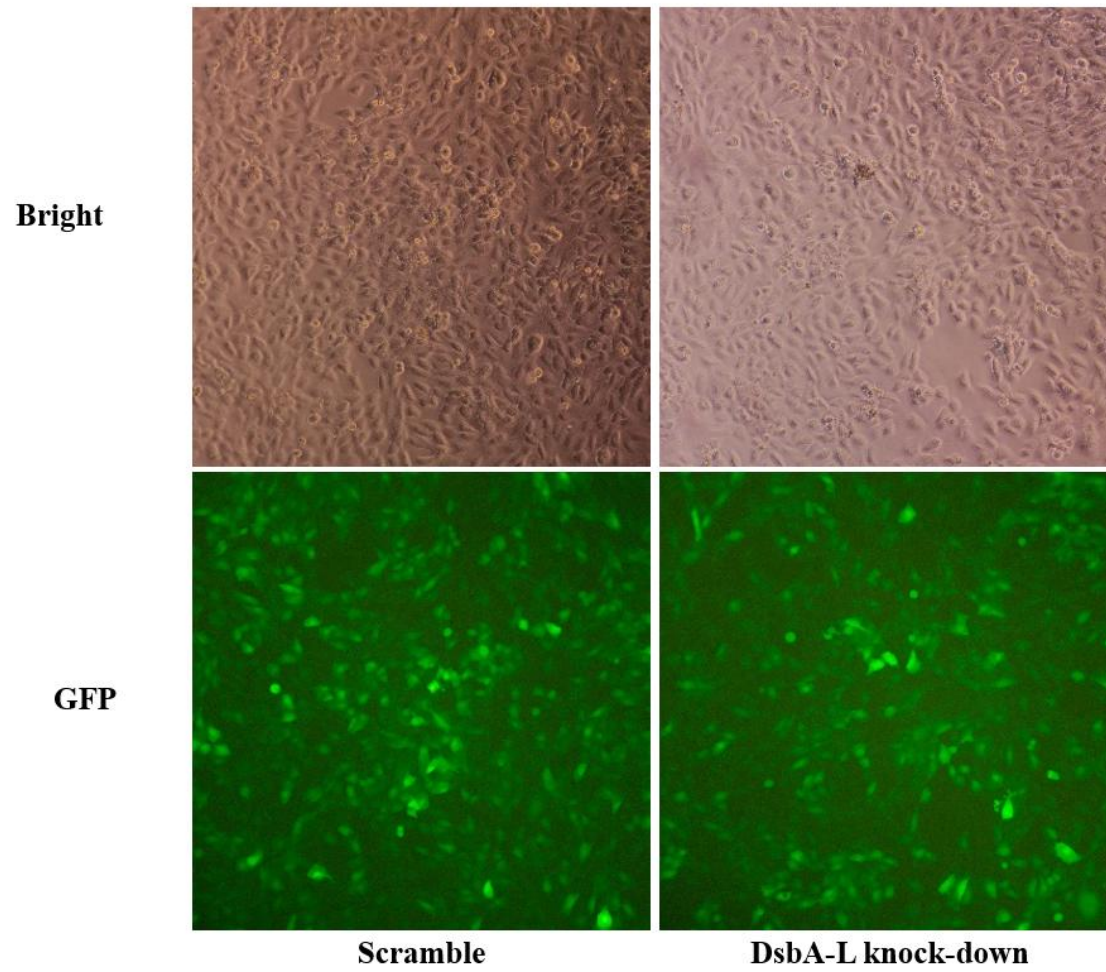

## Supplementary Figure 2

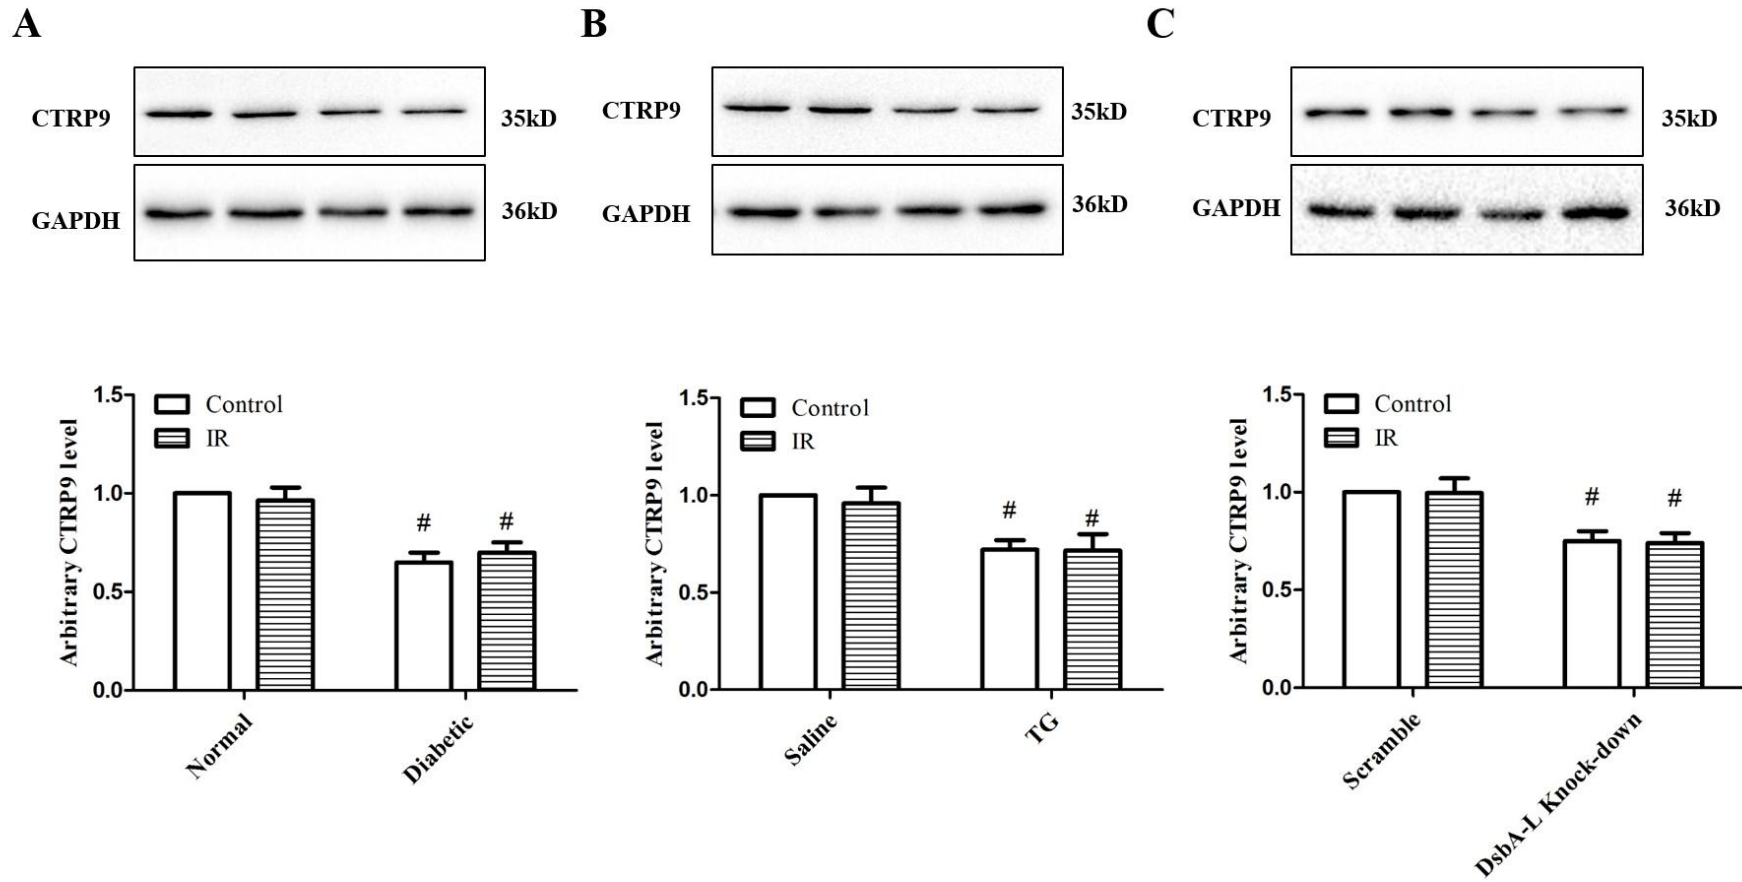

Supplement: f1 [file 1902025.f1.pdf]
